# Supplementary material
Source: publisher figshare collection journal article supplement (https://karger.figshare.com/ndownloader/files/26676347)
Supplement: Supplementary file 1 [file 26676347]

| Assessment | | n | Baseline | 8 months within intervention versus baseline | | | 14 months within intervention versus baseline | | |
| --- | --- | --- | --- | --- | --- | --- | --- | --- | --- |
| Mean (SD) | Mean (SD) | Mean diff | 95% CrI | Mean (SD) | Mean diff | 95% CrI |
| SF-36§ | |  |  |  |  |  |  |  |  |
|  | Physical functioning | 22 | 83.05 (22.13) | 84.32 (21.89) | 2.02 | (-11.44; 15.16) | 88.86 (20.41) | 5.56 | (-8.12; 18.49) |
|  | Role-physical | 22 | 69.32 (40.04) | 76.82 (38.13) | 7.5 | (-18.71; 35.85) | 79.55 (35.89) | 10.49 | (-11.78; 32.74) |
|  | Bodily pain | 22 | 71.68 (22.96) | 74.45 (21.97) | 1.81 | (-13.50; 17.54) | 72.27 (21.15) | 0.65 | (-15.11; 16.49) |
|  | General health | 22 | 66.00 (26.46) | 72.27(22.94) | 6.22 | (-8.63; 21.79) | 69.95 (24.70) | 3.53 | (-11.51; 19.44) |
|  | Mental health | 22 | 56.09 (19.07) | 63.82 (21.04) | 7.41 | (-5.11; 19.61) | 55.82 (17.43) | -1.27 | (-11.92; 9.31) |
|  | Role-emotional | 22 | 58.36 (43.08) | 74.55 (39.74) | 15.21 | (-9.35; 38.34) | 92.32 (17.81) | **35.68*** | (16.67; 54.42) |
|  | Social functioning | 22 | 60.09 (26.07) | 70.73 (25.35) | 10.36 | (-6.20; 26.63) | 52.77 (15.87) | -9.28 | (-23.30; 4.82) |
|  | Vitality | 22 | 56.14 (24.39) | 63.86 (24.39) | 8.15 | (-6.32; 22.48) | 53.18 (13.14) | -3.14 | (-14.32; 8.73) |
|  | |  |  |  |  |  |  |  |  |
| PedsQL† | |  |  |  |  |  |  |  |  |
|  | Physical functioning | 8 | 90.13 (10.56) | 81.88 (24.79) | -10.85 | (-31.63; 6.41) | 84.25 (16.55) | -6.27 | (-23.81; 8.77) |
|  | Emotional functioning | 8 | 68.75 (11.26) | 61.88 (24.92) | -7.56 | (-26.2; 9.69) | 80.00 (11.95) | 10.68 | (-5.56; 23.95) |
|  | Social functioning | 8 | 93.13 (8.84) | 88.13 (11.32) | -5.39 | (-26.10; 15.66) | 95.00 (8.02) | 2 | (-18..7; 22,36) |
|  | School functioning | 8 | 78.75 (20.13) | 70.00 (15.12) | -7.7 | (-25.4; 12.43) | 75.63 (11.16) | -1.68 | (-17.89; 17.60) |

Table S3. Mean (SD) health-related quality of life scores and mean differences at 8 and 14 months within intervention as compared to baseline.

*SF-36*, Short Form Health Survey; *PedsQL*, Pediatric Quality of Life Inventory.

§ Score varies from 25-135, with 25 maximum disability and 135 no disability.

† Score varies from 0-100, with 0 maximum disability and 100 no disability. Ten children participated in the study; two were asymptomatic infants (6 and 18 months-old) and were not evaluated with the PedsQL questionnaire.

95% CrI, 95% Credible Interval.

95% CrI, 95% Credible Interval.

*Indicative of intervention benefit based on a 95% CrI excluding 0.
